# Supplementary figures and images for: Lampenflora in a Show Cave in the Great Basin Is Distinct from Communities on Naturally Lit Rock Surfaces in Nearby Wild Caves
Source: MDPI journal article supplement (doi:10.3390/microorganisms9061188), 2021-05-31

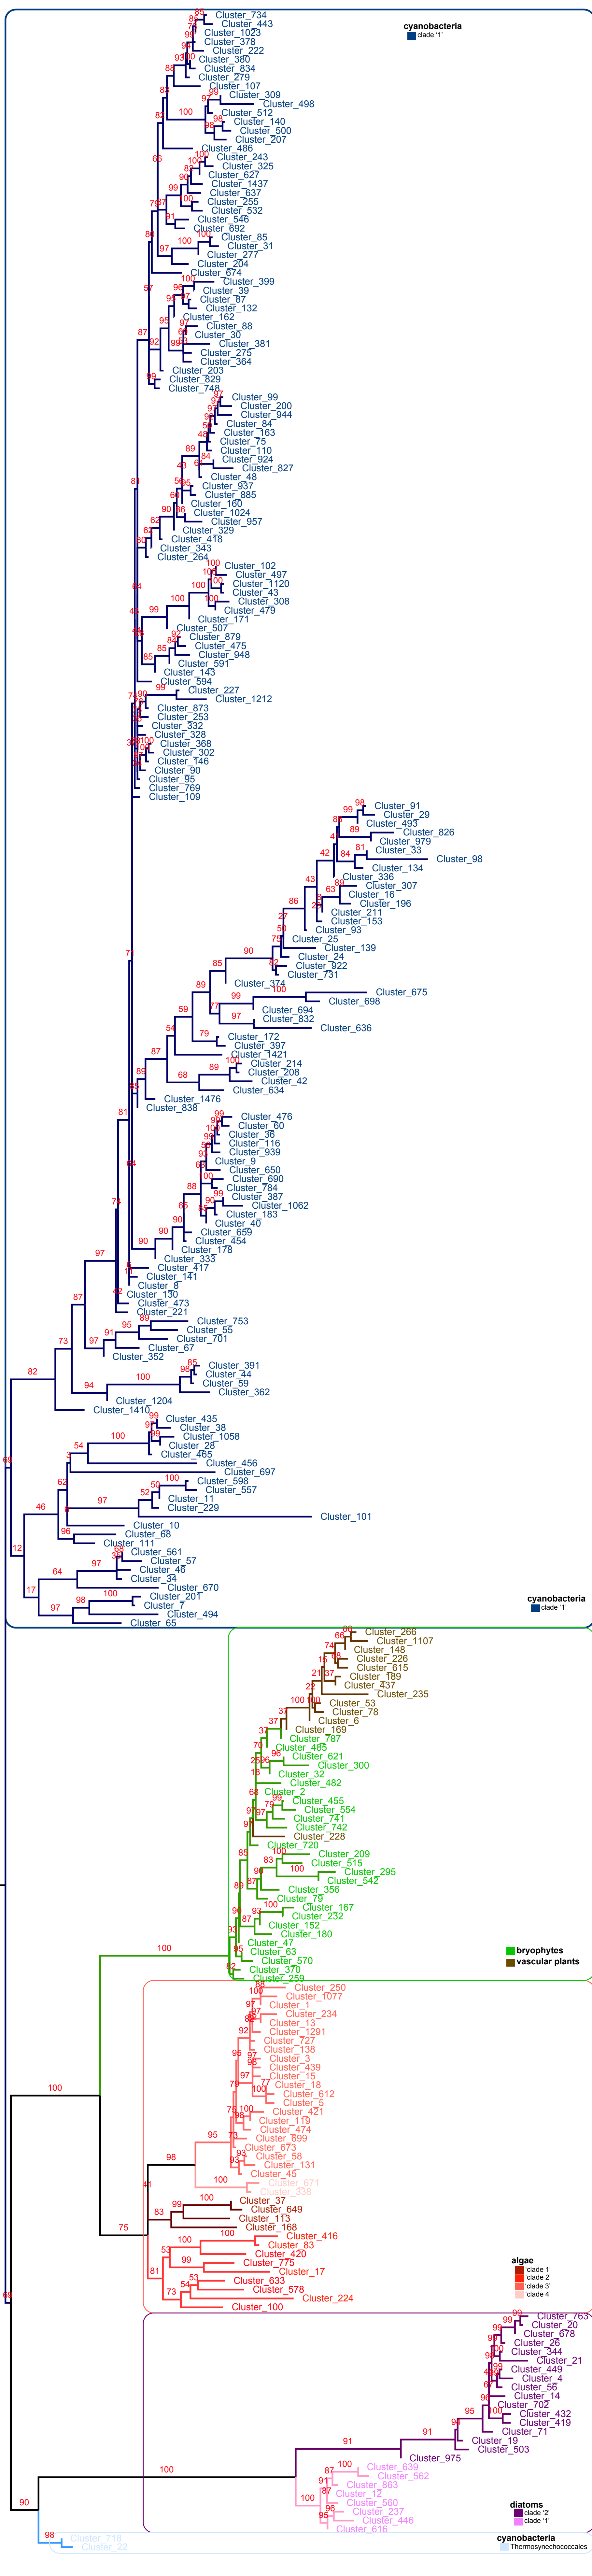

Supplement: s1 [file s1]
